- ship between trifluoroethanol and fluroxene toxicity in mice. *Anesthesia* 23:835-841, 1974 (Japanese)
12. Harrison GG, Smith JS: Massive lethal hepatic necrosis in rats anesthetized with fluroxene, after microsomal enzyme induction. *ANESTHESIOLOGY* 39:619-625, 1973
  13. Ivanetich KM, Marsh JA, Bradshaw J, et al: Fluroxene (2,2,2-trifluoroethyl vinyl ether) mediated destruction of cytochrome P-450 *in vitro*. *Biochem Pharmacol* 24:1933-1936, 1975
  14. Ivanetich KM, Bradshaw J, Marsh JA, et al: The role of cytochrome P-450 in the toxicity of fluroxene (2,2,2-trifluoroethyl vinyl ether) anaesthesia *in vivo*. *Biochem Pharmacol* 25:773-778, 1976
  15. Ivanetich KM, Bradshaw J, Marsh JA, et al: The interaction of hepatic microsomal cytochrome P-450 with fluroxene (2,2,2-trifluoroethyl vinyl ether) *in vitro*. *Biochem Pharmacol* 25:779-784, 1976
  16. Blake DA, Rozman RS, Cascorbi HF, et al: Anesthesia LXXIV: Biotransformation of fluroxene—1. Metabolism in mice and dogs *in vitro*. *Biochem Pharmacol* 16:1237-1248, 1967
  17. Blake DA, Cascorbi HF, Rozman RS, et al: Animal toxicity of 2,2,2-trifluoroethanol. *Toxicol Appl Pharmacol* 15:83-91, 1969
  18. Airaksinen MM, Tammisto T: Toxic actions of the metabolites of halothane: LD<sub>50</sub> and some metabolic effects of trifluoroethanol and trifluoroacetic acid in mice and guinea pigs. *Ann Med Exp Fenn* 46:242-248, 1968
  19. Johnston RR, Eger EI, Stevens WC, et al: Fluroxene toxicity in dogs: Possible mechanisms. *Anesth Analg (Cleve)* 53:998-1003, 1974
  20. Cascorbi HF, Singh-Amaranath AV: Modification of fluroxene toxicity. *ANESTHESIOLOGY* 38:454-457, 1973
  21. Airaksinen MM, Rosenberg PH, Tammisto T: A possible mechanism of toxicity of trifluoroethanol and other halothane metabolites. *Acta Pharmacol Toxicol (Kbh)* 23:299-304, 1970
  22. Van Dyke RA, Gandolfi AJ: Studies on irreversible binding of radioactivity from (<sup>14</sup>C) halothane to rat hepatic microsomal lipids and proteins. *Drug Metab Dispos* 2:469-476, 1974
  23. Cohen EN, Trudell JR, Edmunds HN, et al: Urinary metabolites of halothane in man. *ANESTHESIOLOGY* 43:392-401, 1975
  24. Williams RT: *Detoxication Mechanisms*. London, Chapman and Hall Ltd., 1959, pp 246-248
  25. Gion H, Yoshimura N, Holaday DA, et al: Biotransformation of fluroxene in man. *ANESTHESIOLOGY* 40:553-562, 1974
  26. Baden JM, Kelley M, Wharton RS, et al: Mutagenicity of halogenated ether anesthetics. *ANESTHESIOLOGY* 46:346-350, 1977
  27. Johnston RR, Cromwell TH, Eger EI, et al: The toxicity of fluroxene in animals and man. *ANESTHESIOLOGY* 38:313-319, 1973
  28. Fiserova-Bergerova V: Species differences in metabolism and toxicity of fluroxene. *Xenobiotica* 7:113-114, 1977

### Cardiac Physiology

**PROPRANOLOL, NITROGLYCERIN AND CORONARY-ARTERY DISEASE** Propranolol and nitroglycerin appear to have opposite effects on some aspects of left ventricular performance. Propranolol increases left ventricular volume, while nitroglycerin reduces it. Propranolol slows cardiac rate; an increased rate is often associated with the use of nitroglycerin. The authors have studied both drugs singly and in combination in 18 patients with coronary-artery disease. Nitroglycerin (0.4 mg sublingually) decreased left ventricular end-diastolic volume index (LVEDVI [ml/m<sup>2</sup>]) from 94 ± 8 (SEM) to 66 ± 5. Nitroglycerin administration increased left ventricular ejection fraction (LVEF) from 0.52 ± 0.04 to 0.64 ± 0.05. Cardiac rate increased significantly from 72 ± 2 to 79 ± 79/min. Two hours after oral administration of propranolol (20 mg), cardiac rate had changed significantly (63 ± 2/min); no significant change in LVEDVI or LVEF was observed. When the dosage of propranolol was increased to 40 mg, there was a significant increase in LVEDVI (113 ± 4 ml/m<sup>2</sup>) and a decrease in LVEF (0.47 ± 0.06). Cardiac rate decreased significantly

(63 ± 2). Propranolol (80 mg) produced similar changes in LVEDVI (96 ± 6 ml/m<sup>2</sup>), LVEF (0.58 ± 0.03), and rate (54 ± 2/min). When therapy with both propranolol (40 mg) and nitroglycerin was instituted, LVEDVI was decreased (59 ± 3 ml/m<sup>2</sup>) significantly compared with control. A significant change in LFEF was not observed. Combination of propranolol (80 mg) and nitroglycerin produced a significant decrease in LVEDVI (58 ± 4 ml/m<sup>2</sup>) and a significant increase in LVEF (0.75 ± 0.02) compared with control. Cardiac rates with combination therapy were 64 ± 3/min (propranolol, 40 mg) and 51 ± 2/min (propranolol, 80 mg); the latter value represented a statistically significant change. The authors conclude that the data suggest that combination therapy with nitroglycerin and propranolol may "favorably alter the left ventricular volume and heart rate in terms of the myocardial demand for oxygen." (*Steele PP, and others, Effects of propranolol and nitroglycerin on left ventricular performance in patients with coronary arterial disease. Chest* 73:19-23, 1978.)
